# Supplementary material
Source: MDPI journal article supplement (https://www.mdpi.com/1999-4907/9/3/147)
Supplement: s1 [file s1]

**Table S1.** Effect size, reported as Cohen's *d* and exact Tukey-adjusted *p*-value (in parentheses) of pairwise comparisons among species within water level bins and among water level bins within species of estimated marginal means and slopes.

| Measure                 | Compared Within   | Pairwise Comparison      |                           |                          |
|-------------------------|-------------------|--------------------------|---------------------------|--------------------------|
|                         |                   | Black Ash - Red Maple    | Red Maple - Yellow Birch  | Black Ash - Yellow Birch |
| Mean Sap Flux           | Low Water Levels  | 2.518 (<0.0001)          | 0.110 (0.9327)            | 2.627 (<0.0001)          |
| Mean Sap Flux           | Mean Water Levels | 1.623 (0.0002)           | 0.046 (0.9875)            | 1.670 (0.0001)           |
| Mean Sap Flux           | High Water Levels | 1.320 (0.0039)           | 0.024 (0.9969)            | 1.345 (0.0040)           |
| Sap Flux Response to Dz | Low Water Levels  | 1.733 (0.0868)           | 1.456 (0.0822)            | 3.189 (0.0002)           |
| Sap Flux Response to Dz | Mean Water Levels | 1.755 (0.0677)           | 0.320 (0.8466)            | 2.075 (0.0196)           |
| Sap Flux Response to Dz | High Water Levels | 0.172 (0.9711)           | 0.711 (0.4573)            | 0.883 (0.4550)           |
|                         |                   | Low to Mean Water Levels | Mean to High Water Levels | Low to High Water Levels |
| Mean Sap Flux           | Black Ash         | 0.922 (<0.0001)          | 0.395 (0.0305)            | 1.318 (<0.0001)          |
| Mean Sap Flux           | Red Maple         | 0.028 (0.9691)           | 0.116 (0.3895)            | 0.144 (0.5548)           |
| Mean Sap Flux           | Yellow Birch      | 0.036 (0.9450)           | 0.010 (0.9969)            | 0.046 (0.8696)           |
| Sap Flux Response to Dz | Black Ash         | 1.177 (0.0813)           | 1.761 (0.0105)            | 2.938 (<0.0001)          |
| Sap Flux Response to Dz | Red Maple         | 1.199 (0.0195)           | 0.179 (0.8819)            | 1.377 (0.0094)           |
| Sap Flux Response to Dz | Yellow Birch      | 0.063 (0.9839)           | 0.569 (0.2218)            | 0.632 (0.2867)           |

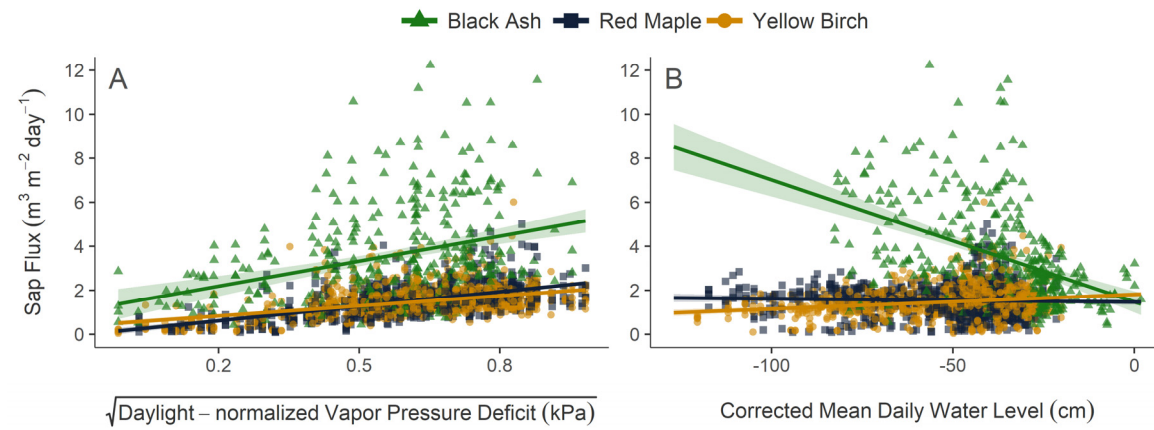

**Figure S1.** Daily mean sap flux of individual probes by (A) daylight-normalized vapor-pressure deficit ( $D_z$ ) and (B) mean daily water level. Linear models with 95% prediction intervals fit individually for each driver.
